# Supplementary figures and images for: A universal synthesis of ultrathin Pd-based nanorings for efficient ethanol electrooxidation
Source: Royal Society of Chemistry journal article supplement (doi:10.1039/d2mh01363k), 2023-01-01

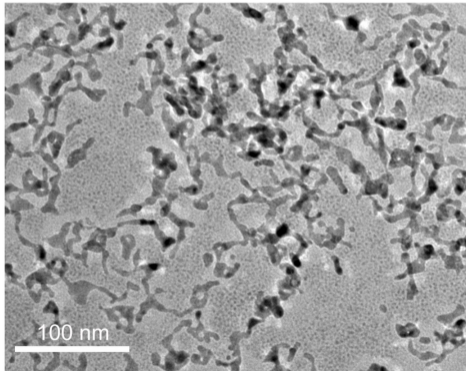

Supplement: d2mh01363k1.pdf [file d2mh01363k1.pdf]
